# Supplementary material for: Effect of bismuth substitution on crystal chemistry, photocatalysis and conductivity in Sr3V2O8: a new structural type in palmierite class
Source: Royal Society of Chemistry journal article supplement (doi:10.1039/c2ra20937c), 2012-01-01
Supplement: c2ra20937c.pdf [file c2ra20937c.pdf]

Supplementary Information for

Effect of Bismuth Substitution on Crystal  
Chemistry, Photocatalysis and Conductivity in  
 $\text{Sr}_3\text{V}_2\text{O}_8$ : A new Structural type in Palmierite Class

*Dipankar Saha, Prangya Parimita Sahoo, Giridhar Madras and Tayur N. Guru Row\**

Solid State and Structural Chemistry Unit, Indian Institute of Science, Bangalore 560 012, India.

---

\* Corresponding author: E-mail: [ssctng@sscu.iisc.ernet.in](mailto:ssctng@sscu.iisc.ernet.in) Tel: +91-80-2292796 Fax: +91-80-3601310

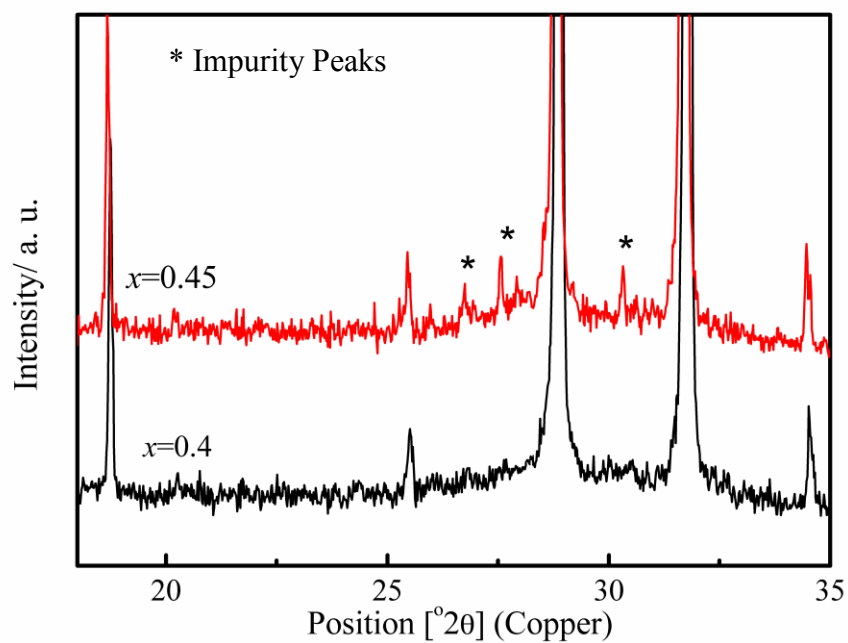

**Fig. S1** Comparison of the powder pattern in limited  $2\theta$  region with the solid solution members  $x=0.45$  and  $x=0.4$  showing the presence of impurity peaks for composition  $x=0.45$ .

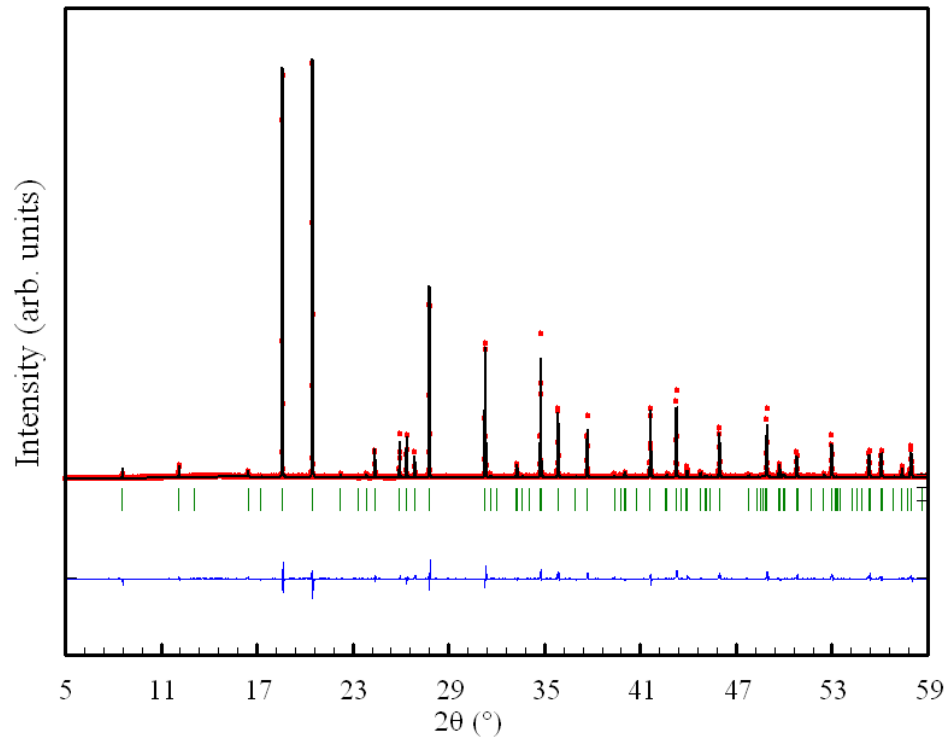

**Fig. S2** Fitted Profile after Rietveld refinement of  $\text{Sr}_{2.8}\text{Bi}_{0.13}\text{V}_2\text{O}_8$ .

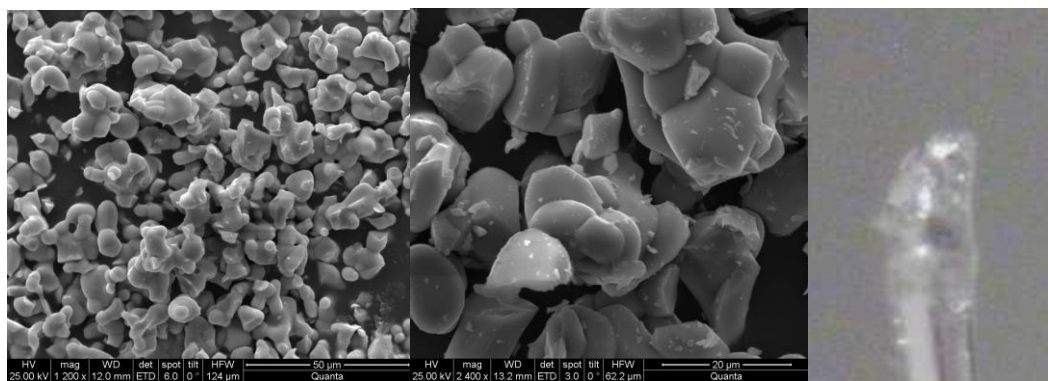

**Fig. S3** (a) SEM micrograph of (b) Optical micrograph  $\text{Sr}_{2.8}\text{Bi}_{0.13}\text{V}_2\text{O}_8$ .

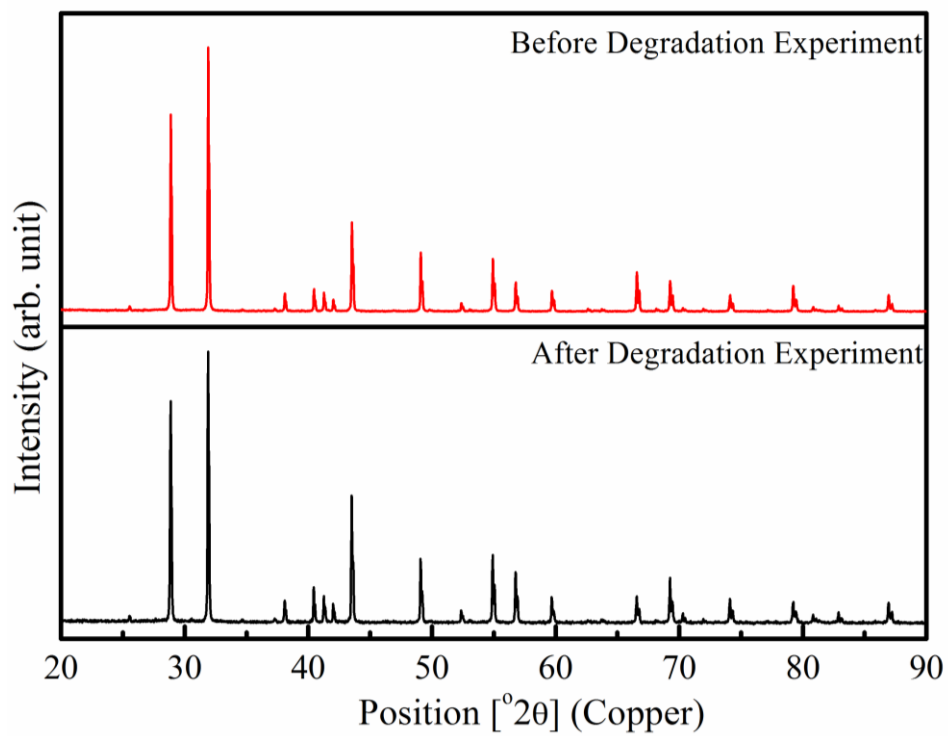

**Fig. S4** Comparison of the PXRD pattern of the  $\text{Sr}_3\text{V}_2\text{O}_8$  before and after degradation experiments.
